# Supplementary material
Source: HighWire-hosted journal article supplement (https://bjo.bmj.com/content/108/3/424)

## Supplementary Materials

**Full title:** Application of artificial intelligence system for screening multiple fundus diseases in Chinese primary healthcare settings: a real-world, multicenter and cross-sectional study of 4795 cases

**Authors:** Chufeng Gu, Yujie Wang, Yan Jiang, Feiping Xu, Shasha Wang, Rui Liu, Wen Yuan, Nurbiyimu Abudureyimu, Ying Wang, Yulan Lu, Xiaolong Li, Tao Wu, Li Dong, Yuzhong Chen, Bin Wang, Yuncheng Zhang, Wen Bin Wei, Qinghua Qiu, Zhi Zheng, Deng Liu, Jili Chen

### Table of Contents

**Table S1.** Performance of ARAS in internal validation dataset

**Table S2.** Performance of ARAS in external test dataset

**Table S3.** Manufacturers and camera models used in this study

**Table S4.** Demographic characteristics and fundus conditions of 2528 participants in Shanghai primary healthcare settings

**Table S5.** Demographic characteristics and fundus conditions of 2267 participants in Xinjiang primary healthcare settings

**Figure S1.** Flowchart of the overall design in this study

**Figure S2.** The overall architecture of ARAS

**Figure S3.** Heatmap visualization of referable diabetic retinopathy

**Figure S4.** Heatmap visualization of referable hypertensive retinopathy

**Figure S5.** Heatmap visualization of glaucomatous optic neuropathy

**Figure S6.** Heatmap visualization of pathological myopia

**Figure S7.** Heatmap visualization of retinal vein occlusion

**Figure S8.** Heatmap visualization of retinal detachment

**Figure S9.** Heatmap visualization of macula holes

**Figure S10.** Heatmap visualization of macular edema

**Figure S11.** Heatmap visualization of central serous chorioretinopathy

**Figure S12.** Heatmap visualization of epiretinal membrane

**Figure S13.** Heatmap visualization of retinitis pigmentosa

**Figure S14.** Heatmap visualization of retina drusen

**Figure S15.** Heatmap visualization of macular neovascularization

**Figure S16.** Heatmap visualization of geographic atrophy

**Figure S17.** Fundus conditions of 2528 participants in Shanghai primary healthcare settings

**Figure S18.** Fundus conditions of 2267 participants in Xinjiang primary healthcare settings

**Table S1. Performance of ARAS in internal validation dataset**

|                                           | Number of cases | Accuracy (95% CI)   | Specificity (95% CI) | Sensitivity (95% CI) |
|-------------------------------------------|-----------------|---------------------|----------------------|----------------------|
| <b>Normal fundus</b>                      | 10749           | 0.816 (0.815-0.820) | 0.870 (0.867-0.873)  | 0.773 (0.770-0.775)  |
| <b>Referable diabetic retinopathy</b>     | 575             | 0.975 (0.972-0.976) | 0.980 (0.978-0.981)  | 0.819 (0.817-0.821)  |
| <b>Referable hypertensive retinopathy</b> | 457             | 0.882 (0.881-0.885) | 0.883 (0.881-0.884)  | 0.834 (0.832-0.839)  |
| <b>Glaucomatous optic neuropathy</b>      | 4079            | 0.934 (0.932-0.935) | 0.956 (0.954-0.956)  | 0.853 (0.852-0.856)  |
| <b>Pathological myopia</b>                | 504             | 0.941 (0.939-0.942) | 0.940 (0.938-0.941)  | 0.960 (0.958-0.961)  |
| <b>Retinal vein occlusion</b>             | 54              | 0.933 (0.932-0.933) | 0.933 (0.932-0.933)  | 0.926 (0.924-0.927)  |
| <b>Retinal detachment</b>                 | 73              | 0.933 (0.932-0.934) | 0.933 (0.932-0.934)  | 0.945 (0.944-0.946)  |
| <b>Macula holes</b>                       | 32              | 0.955 (0.952-0.957) | 0.956 (0.954-0.957)  | 0.938 (0.936-0.939)  |
| <b>Macular edema</b>                      | 118             | 0.937 (0.935-0.938) | 0.938 (0.936-0.939)  | 0.924 (0.923-0.925)  |
| <b>Central serous chorioretinopathy</b>   | 184             | 0.928 (0.927-0.930) | 0.927 (0.925-0.928)  | 0.951 (0.950-0.952)  |
| <b>Epiretinal membrane</b>                | 1220            | 0.965 (0.964-0.966) | 0.964 (0.963-0.965)  | 0.975 (0.974-0.976)  |
| <b>Retinitis pigmentosa</b>               | 37              | 0.983 (0.982-0.984) | 0.983 (0.982-0.984)  | 0.892 (0.891-0.894)  |
| <b>Retina drusen</b>                      | 1068            | 0.929 (0.927-0.930) | 0.926 (0.925-0.927)  | 0.988 (0.987-0.989)  |
| <b>Macular neovascularization</b>         | 439             | 0.936 (0.935-0.937) | 0.935 (0.934-0.937)  | 0.975 (0.974-0.976)  |
| <b>Geographic atrophy</b>                 | 40              | 0.973 (0.972-0.973) | 0.973 (0.972-0.973)  | 0.925 (0.924-0.927)  |

For ARAS development, 115, 944 fundus images from 10 iKang Health Care centers and the Beijing Tongren Hospital between June 2018 and June 2020 were used. The dataset was then randomized into a training data set and an internal validation data set with a ratio of 5 to 1.

The above data are derived from an unpublished study.

**Table S2. Performance of ARAS in external test dataset**

|                                           | Number of cases | Accuracy (95% CI)   | Specificity (95% CI) | Sensitivity (95% CI) |
|-------------------------------------------|-----------------|---------------------|----------------------|----------------------|
| <b>Normal fundus</b>                      | 170038          | 0.810 (0.809-0.813) | 0.900 (0.898-0.902)  | 0.789 (0.784-0.790)  |
| <b>Referable diabetic retinopathy</b>     | 6508            | 0.983 (0.981-0.984) | 0.987 (0.985-0.989)  | 0.838 (0.836-0.845)  |
| <b>Referable hypertensive retinopathy</b> | 1854            | 0.865 (0.865-0.866) | 0.865 (0.865-0.866)  | 0.866 (0.864-0.869)  |
| <b>Glaucomatous optic neuropathy</b>      | 10214           | 0.945 (0.944-0.946) | 0.949 (0.947-0.950)  | 0.860 (0.860-0.866)  |
| <b>Pathological myopia</b>                | 2105            | 0.955 (0.954-0.956) | 0.955 (0.954-0.956)  | 0.949 (0.948-0.951)  |
| <b>Retinal vein occlusion</b>             | 703             | 0.954 (0.954-0.955) | 0.954 (0.954-0.955)  | 0.977 (0.976-0.978)  |
| <b>Retinal detachment</b>                 | 68              | 0.953 (0.952-0.953) | 0.953 (0.952-0.953)  | 0.912 (0.910-0.912)  |
| <b>Macula holes</b>                       | 235             | 0.951 (0.950-0.951) | 0.951 (0.950-0.951)  | 0.877 (0.875-0.879)  |
| <b>Macular edema</b>                      | 6483            | 0.976 (0.975-0.977) | 0.977 (0.976-0.978)  | 0.947 (0.946-0.948)  |
| <b>Central serous chorioretinopathy</b>   | 92              | 0.926 (0.925-0.927) | 0.926 (0.925-0.927)  | 0.967 (0.966-0.968)  |
| <b>Epiretinal membrane</b>                | 4031            | 0.958 (0.957-0.959) | 0.960 (0.958-0.961)  | 0.870 (0.868-0.872)  |
| <b>Retinitis pigmentosa</b>               | 90              | 0.946 (0.945-0.947) | 0.946 (0.945-0.947)  | 0.944 (0.943-0.945)  |
| <b>Retina drusen</b>                      | 7133            | 0.969 (0.967-0.969) | 0.970 (0.969-0.971)  | 0.954 (0.953-0.956)  |
| <b>Macular neovascularization</b>         | 1991            | 0.957 (0.956-0.958) | 0.958 (0.957-0.959)  | 0.905 (0.903-0.905)  |
| <b>Geographic atrophy</b>                 | 63              | 0.956 (0.956-0.957) | 0.956 (0.956-0.957)  | 0.921 (0.920-0.922)  |

In order to verify the performance of ARAS, 209,053 fundus images were prospectively collected (from November 2020 to February 2021) from 65 examination centers across 19 Chinese provinces.

The above data are derived from an unpublished study.

**Table S3. Manufacturers and camera models used in this study**

| Primary healthcare settings                        | Manufacturer | Camera model |
|----------------------------------------------------|--------------|--------------|
| Linfen Community Health Service Center             | Topcon       | NW 300       |
| Pengpu New Village Community Health Service Center | Topcon       | NW 300       |
| Pengpu Town Community Health Service Center        | Topcon       | NW 300       |
| Bachu County People's Hospital                     | Topcon       | NW 300       |
| Bachu County Traditional Chinese Medicine Hospital | Syseye       | RetiCam 3100 |
| Selibuya Town Center Health Center                 | Syseye       | RetiCam 3100 |

Table S4. Demographic characteristics and fundus conditions of 2528 participants in Shanghai primary healthcare settings

| Variable                           | Total (n=2528)    | Linfen Community Health Service Center (n=1349) | Pengpu New Village Community Health Service Center (n=824) | Pengpu Town Community Health Service Center (n=355) | p-value |
|------------------------------------|-------------------|-------------------------------------------------|------------------------------------------------------------|-----------------------------------------------------|---------|
| Age (years)                        | 64.0 (55.0, 70.0) | 66.0 (61.0, 70.0)                               | 64.0 (54.0, 70.0)                                          | 39.0 (30.0, 57.0)                                   | <0.001* |
| Gender                             |                   |                                                 |                                                            |                                                     | <0.001* |
| Female                             | 1,874 (74.1)      | 979 (72.6)                                      | 670 (81.3)                                                 | 225 (63.4)                                          |         |
| Male                               | 654 (25.9)        | 370 (27.4)                                      | 154 (18.7)                                                 | 130 (36.6)                                          |         |
| Normal fundus                      | 62 (2.5)          | 17 (1.3)                                        | 32 (3.9)                                                   | 13 (3.7)                                            | <0.001* |
| Referable diabetic retinopathy     | 211 (8.3)         | 100 (7.4)                                       | 88 (10.7)                                                  | 23 (6.5)                                            | 0.011*  |
| Referable hypertensive retinopathy | 3 (0.1)           | 2 (0.1)                                         | 1 (0.1)                                                    | 0 (0)                                               | 1       |
| Glaucomatous optic neuropathy      | 394 (15.6)        | 227 (16.8)                                      | 128 (15.5)                                                 | 39 (11.0)                                           | 0.026*  |
| Pathological myopia                | 471 (18.6)        | 286 (21.2)                                      | 155 (18.8)                                                 | 30 (8.5)                                            | <0.001* |
| Retinal vein occlusion             | 14 (0.6)          | 8 (0.6)                                         | 4 (0.5)                                                    | 2 (0.6)                                             | 1       |
| Retinal detachment                 | 0 (0)             | 0 (0)                                           | 0 (0)                                                      | 0 (0)                                               | /       |
| Macular holes                      | 12 (0.5)          | 7 (0.5)                                         | 4 (0.5)                                                    | 1 (0.3)                                             | 1       |
| Macular edema                      | 79 (3.1)          | 47 (3.5)                                        | 25 (3.0)                                                   | 7 (2.0)                                             | 0.340   |
| Central serous chorioretinopathy   | 6 (0.2)           | 6 (0.4)                                         | 0 (0)                                                      | 0 (0)                                               | 0.104   |
| Epiretinal membranes               | 242 (9.6)         | 162 (12.0)                                      | 74 (9.0)                                                   | 6 (1.7)                                             | <0.001* |
| Retinitis pigmentosa               | 2 (0.1)           | 0 (0)                                           | 1 (0.1)                                                    | 1 (0.3)                                             | 0.111   |
| Retinal drusen                     | 266 (10.5)        | 90 (6.7)                                        | 165 (20.0)                                                 | 11 (3.1)                                            | <0.001* |
| Macular neovascularization         | 55 (2.2)          | 41 (3.0)                                        | 8 (1.0)                                                    | 6 (1.7)                                             | 0.005*  |
| Geographic atrophy                 | 5 (0.2)           | 4 (0.3)                                         | 1 (0.1)                                                    | 0 (0)                                               | 0.699   |

Data are presented as median (interquartile range) or n (%).

\*Statistically significant.

**Table S5. Demographic characteristics and fundus conditions of 2267 participants in Xinjiang primary healthcare settings**

| Variable                           | Total (n=2267)    | Bachu County<br>Traditional Chinese<br>Medicine Hospital<br>(n=327) | Bachu County<br>People's<br>Hospital<br>(n=1636) | Selibuya Town<br>Center Health<br>Center (n=304) | <i>p</i> -value |
|------------------------------------|-------------------|---------------------------------------------------------------------|--------------------------------------------------|--------------------------------------------------|-----------------|
| Age (years)                        | 44.0 (32.0, 56.0) | 47.0 (35.0, 56.5)                                                   | 45.0 (31.0, 58.0)                                | 41.0 (32.0, 45.0)                                | <0.001*         |
| Gender                             |                   |                                                                     |                                                  |                                                  | 0.831           |
| Female                             | 1,301 (57.4)      | 183 (56.0)                                                          | 941 (57.5)                                       | 177 (58.2)                                       |                 |
| Male                               | 966 (42.6)        | 144 (44.0)                                                          | 695 (42.5)                                       | 127 (41.8)                                       |                 |
| Normal fundus                      | 453 (20.0)        | 48 (14.7)                                                           | 327 (20.0)                                       | 78 (25.7)                                        | 0.003*          |
| Referable diabetic retinopathy     | 175 (7.7)         | 17 (5.2)                                                            | 155 (9.5)                                        | 3 (1.0)                                          | <0.001*         |
| Referable hypertensive retinopathy | 5 (0.2)           | 0 (0)                                                               | 5 (0.3)                                          | 0 (0)                                            | 0.804           |
| Glaucomatous optic neuropathy      | 178 (7.9)         | 24 (7.3)                                                            | 132 (8.1)                                        | 22 (7.2)                                         | 0.825           |
| Pathological myopia                | 25 (1.1)          | 2 (0.6)                                                             | 22 (1.3)                                         | 1 (0.3)                                          | 0.253           |
| Retinal vein occlusion             | 43 (1.9)          | 2 (0.6)                                                             | 40 (2.4)                                         | 1 (0.3)                                          | 0.008*          |
| Retinal detachment                 | 0 (0)             | 0 (0)                                                               | 0 (0)                                            | 0 (0)                                            | /               |
| Macular holes                      | 5 (0.2)           | 2 (0.6)                                                             | 3 (0.2)                                          | 0 (0)                                            | 0.281           |
| Macular edema                      | 158 (7.0)         | 26 (8.0)                                                            | 122 (7.5)                                        | 10 (3.3)                                         | 0.024*          |
| Central serous chorioretinopathy   | 1 (0.0)           | 0 (0)                                                               | 1 (0.1)                                          | 0 (0)                                            | 1               |
| Epiretinal membranes               | 76 (3.4)          | 9 (2.8)                                                             | 63 (3.9)                                         | 4 (1.3)                                          | 0.064           |
| Retinitis pigmentosa               | 14 (0.6)          | 1 (0.3)                                                             | 10 (0.6)                                         | 3 (1.0)                                          | 0.507           |
| Retinal drusen                     | 27 (1.2)          | 3 (0.9)                                                             | 23 (1.4)                                         | 1 (0.3)                                          | 0.311           |
| Macular neovascularization         | 9 (0.4)           | 2 (0.6)                                                             | 7 (0.4)                                          | 0 (0)                                            | 0.481           |
| Geographic atrophy                 | 0 (0)             | 0 (0)                                                               | 0 (0)                                            | 0 (0)                                            | /               |

Data are presented as median (interquartile range) or n (%).

\*Statistically significant.

**Figure S1. Flowchart of the overall design in this study**

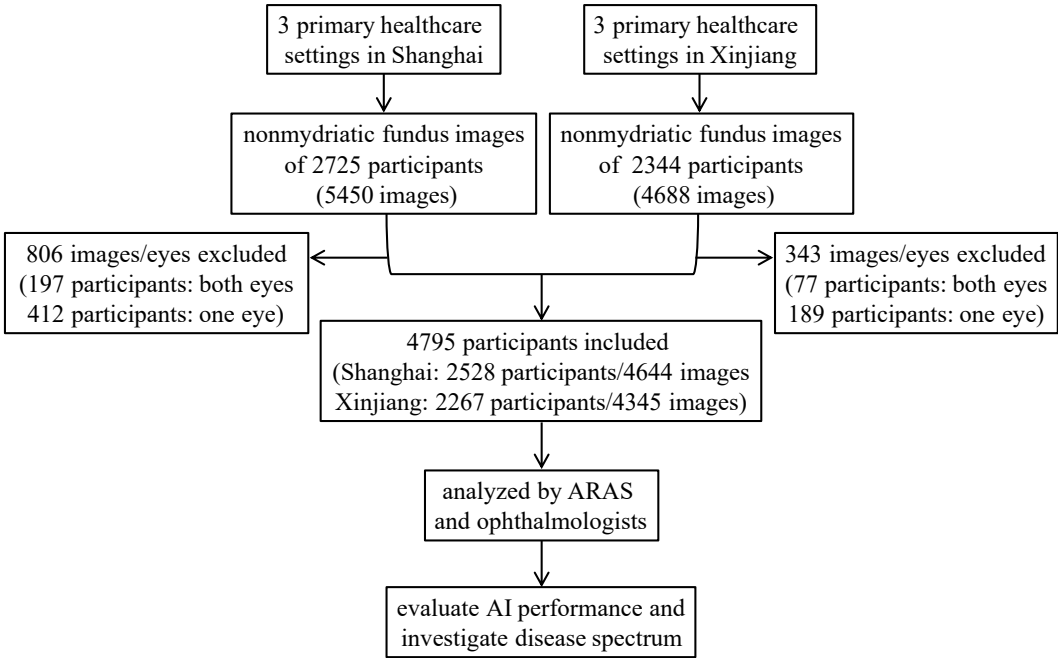

Figure S2. The overall architecture of ARAS

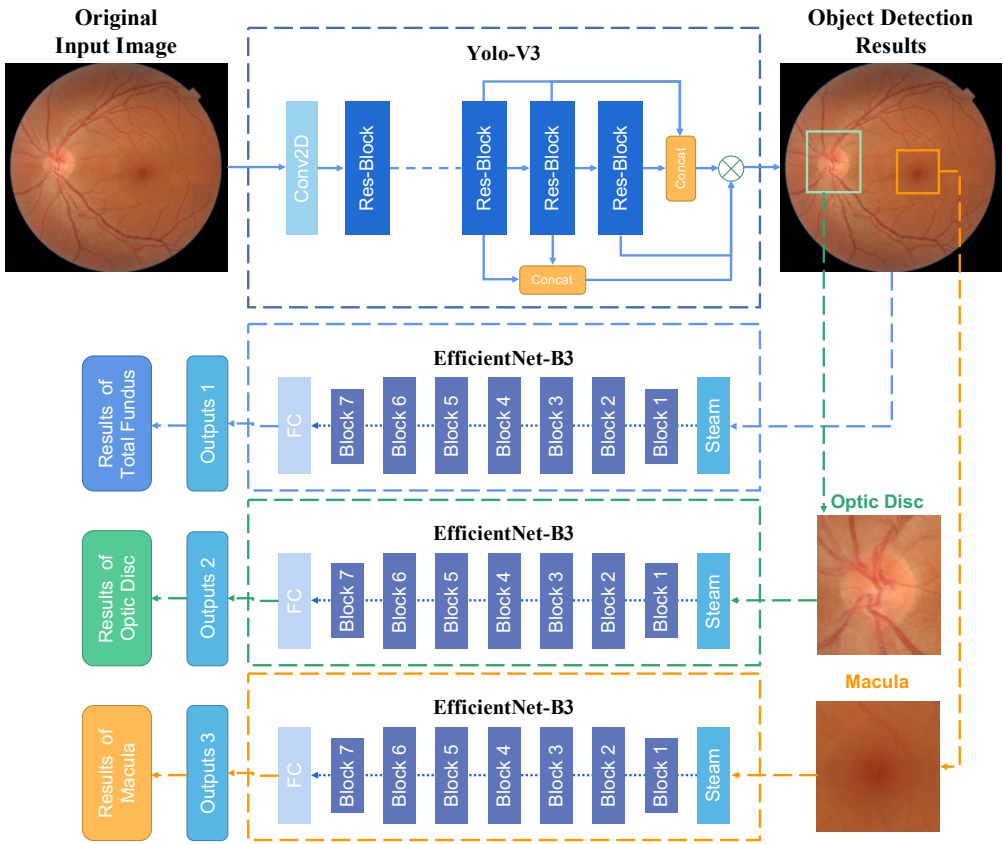

The framework consists of two AI submodules: a detection model for the macula and optic disc region and a multitask learning model for retinal disease classification.



**Figure S3. Heatmap visualization of referable diabetic retinopathy**

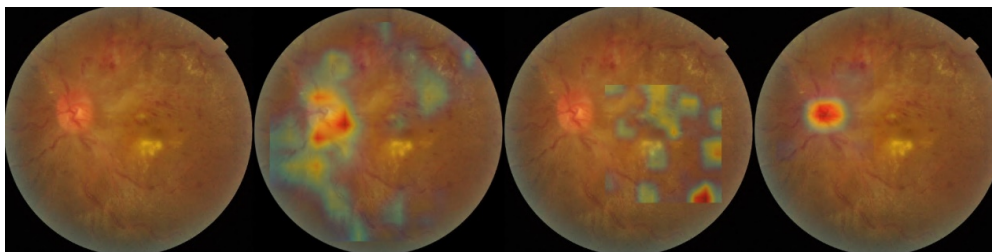

Heatmap demonstrating representative lesions, shown in original fundus image (first column), general heatmap (second column), macula heatmap (third column), and optic-disc heatmap (last column).

**Figure S4. Heatmap visualization of referable hypertensive retinopathy**

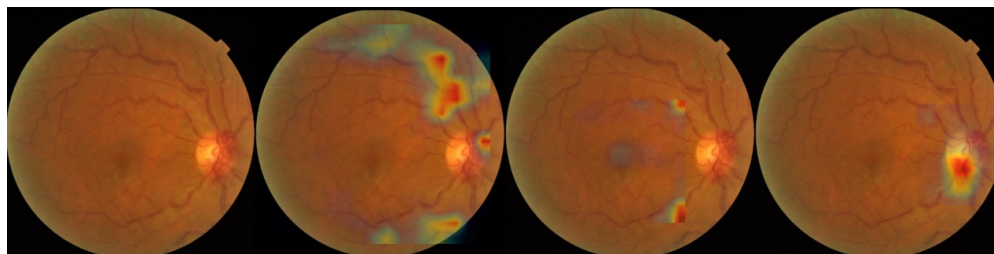

Heatmap demonstrating representative lesions, shown in original fundus image (first column), general heatmap (second column), macula heatmap (third column), and optic-disc heatmap (last column).

**Figure S5. Heatmap visualization of glaucomatous optic neuropathy**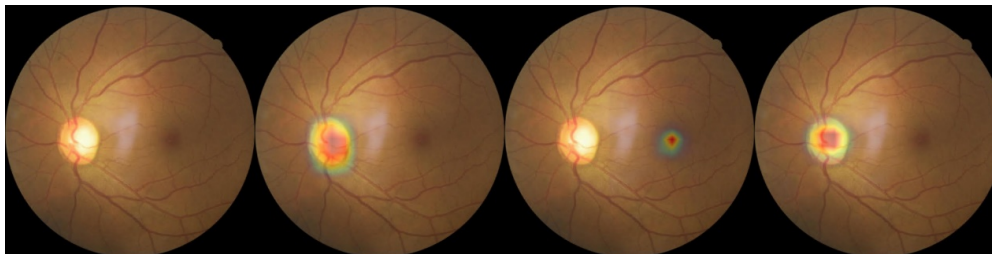

Heatmap demonstrating representative lesions, shown in original fundus image (first column), general heatmap (second column), macula heatmap (third column), and optic-disc heatmap (last column).

**Figure S6. Heatmap visualization of pathological myopia**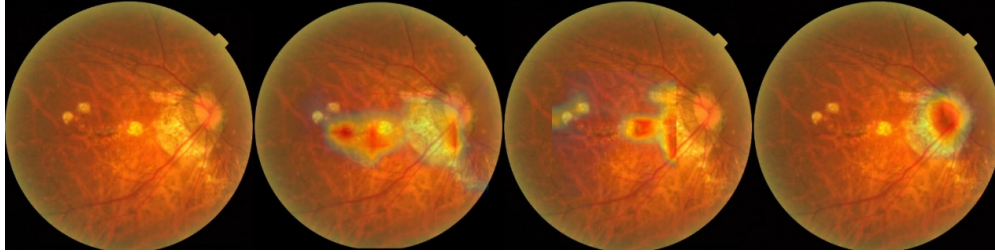

Heatmap demonstrating representative lesions, shown in original fundus image (first column), general heatmap (second column), macula heatmap (third column), and optic-disc heatmap (last column).

**Figure S7. Heatmap visualization of retinal vein occlusion**

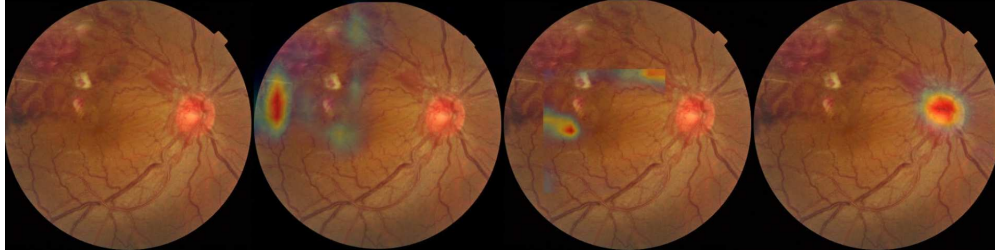

Heatmap demonstrating representative lesions, shown in original fundus image (first column), general heatmap (second column), macula heatmap (third column), and optic-disc heatmap (last column).

**Figure S8. Heatmap visualization of retinal detachment**

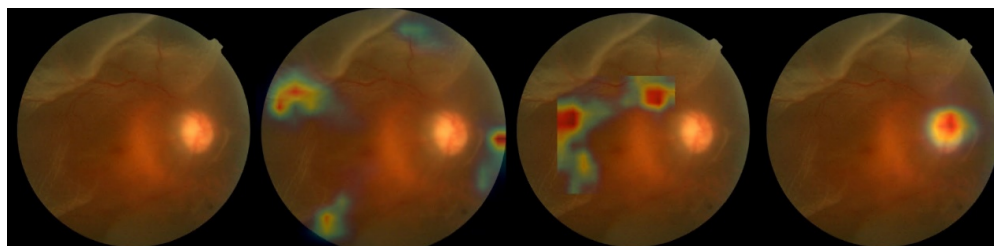

Heatmap demonstrating representative lesions, shown in original fundus image (first column), general heatmap (second column), macula heatmap (third column), and optic-disc heatmap (last column).

**Figure S9. Heatmap visualization of macula holes**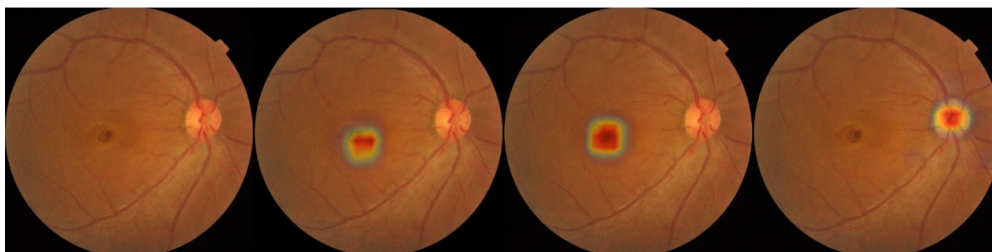

Heatmap demonstrating representative lesions, shown in original fundus image (first column), general heatmap (second column), macula heatmap (third column), and optic-disc heatmap (last column).

**Figure S10. Heatmap visualization of macular edema**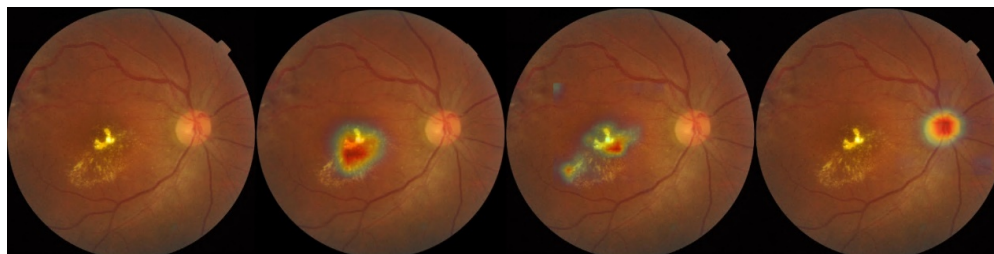

Heatmap demonstrating representative lesions, shown in original fundus image (first column), general heatmap (second column), macula heatmap (third column), and optic-disc heatmap (last column).



**Figure S11. Heatmap visualization of central serous chorioretinopathy**

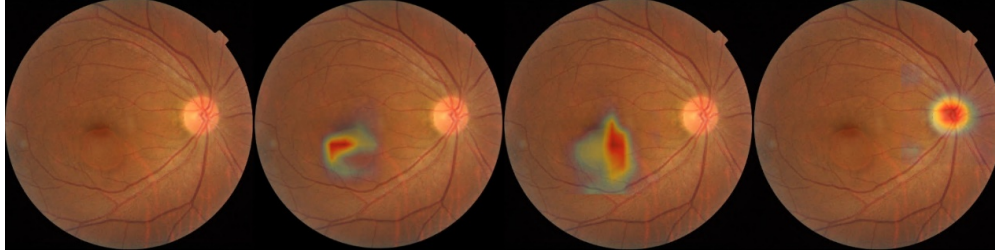

Heatmap demonstrating representative lesions, shown in original fundus image (first column), general heatmap (second column), macula heatmap (third column), and optic-disc heatmap (last column).

**Figure S12. Heatmap visualization of epiretinal membrane**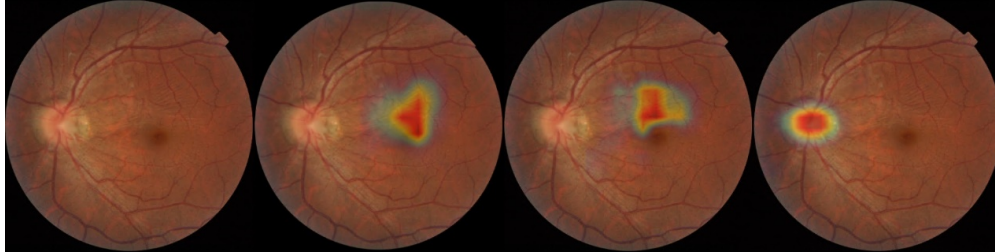

Heatmap demonstrating representative lesions, shown in original fundus image (first column), general heatmap (second column), macula heatmap (third column), and optic-disc heatmap (last column).

**Figure S13. Heatmap visualization of retinitis pigmentosa**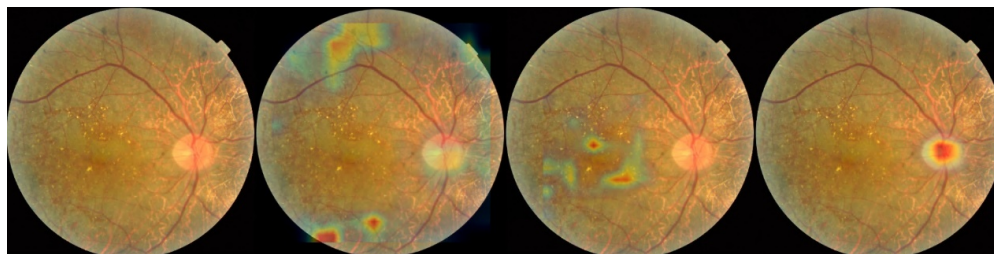

Heatmap demonstrating representative lesions, shown in original fundus image (first column), general heatmap (second column), macula heatmap (third column), and optic-disc heatmap (last column).

**Figure S14. Heatmap visualization of retina drusen**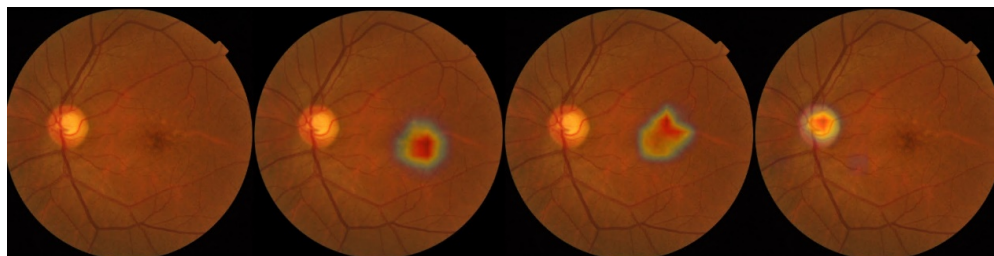

Heatmap demonstrating representative lesions, shown in original fundus image (first column), general heatmap (second column), macula heatmap (third column), and optic-disc heatmap (last column).

**Figure S15. Heatmap visualization of macular neovascularization**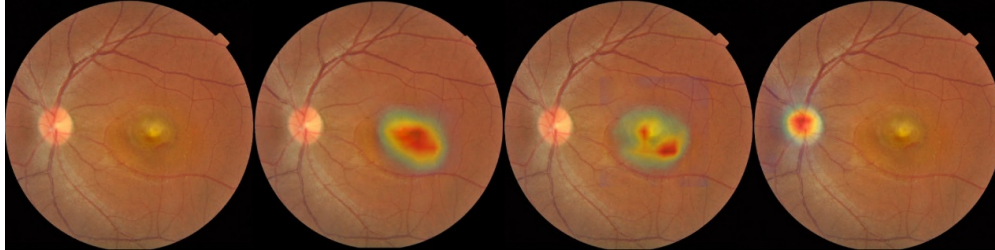

Heatmap demonstrating representative lesions, shown in original fundus image (first column), general heatmap (second column), macula heatmap (third column), and optic-disc heatmap (last column).

**Figure S16. Heatmap visualization of geographic atrophy**

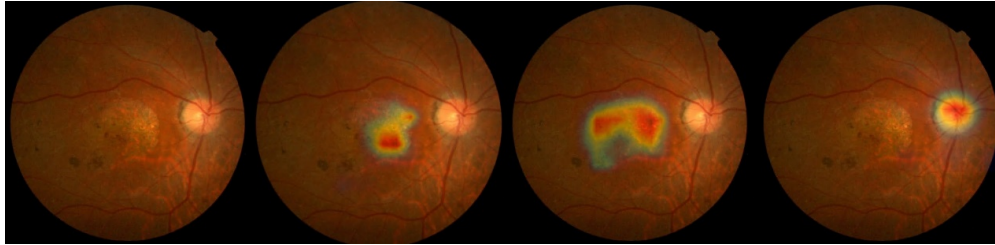

Heatmap demonstrating representative lesions, shown in original fundus image (first column), general heatmap (second column), macula heatmap (third column), and optic-disc heatmap (last column).

**Figure S17.** Fundus conditions of 2528 participants in Shanghai primary healthcare settings

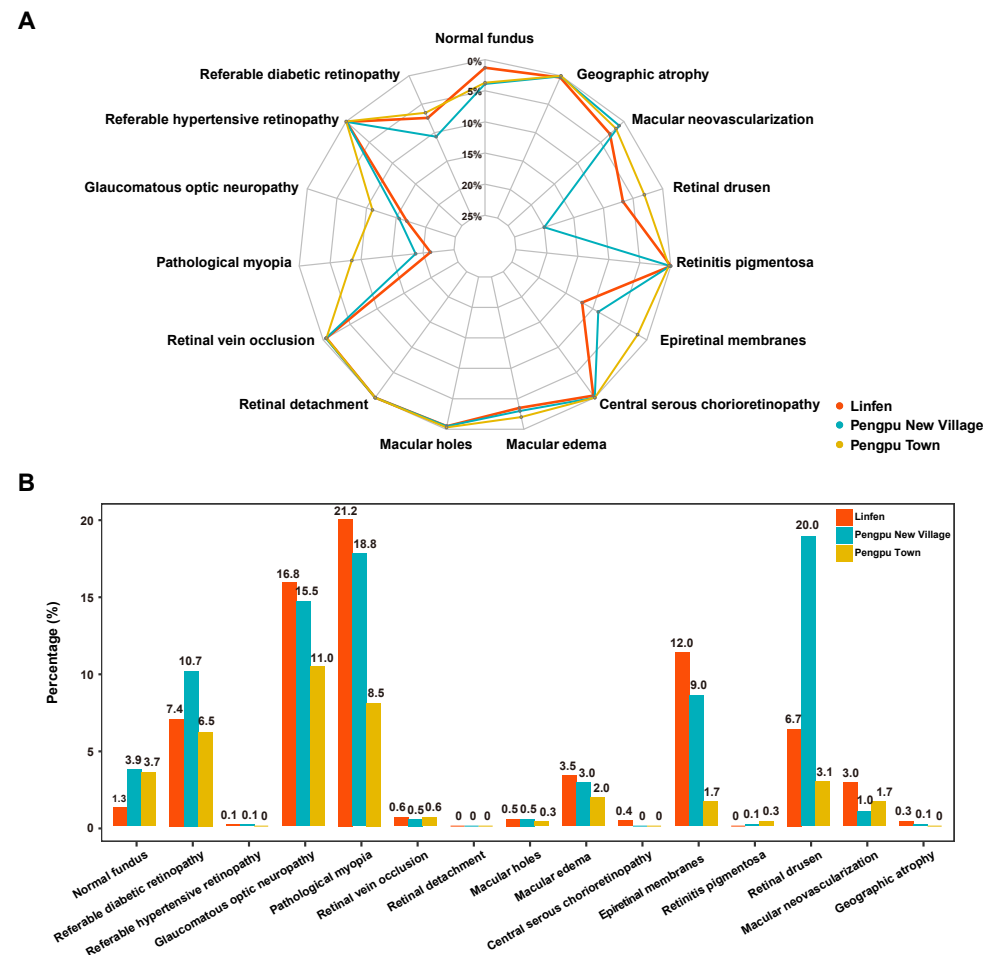

**Figure S18.** Fundus conditions of 2267 participants in Xinjiang primary healthcare settings

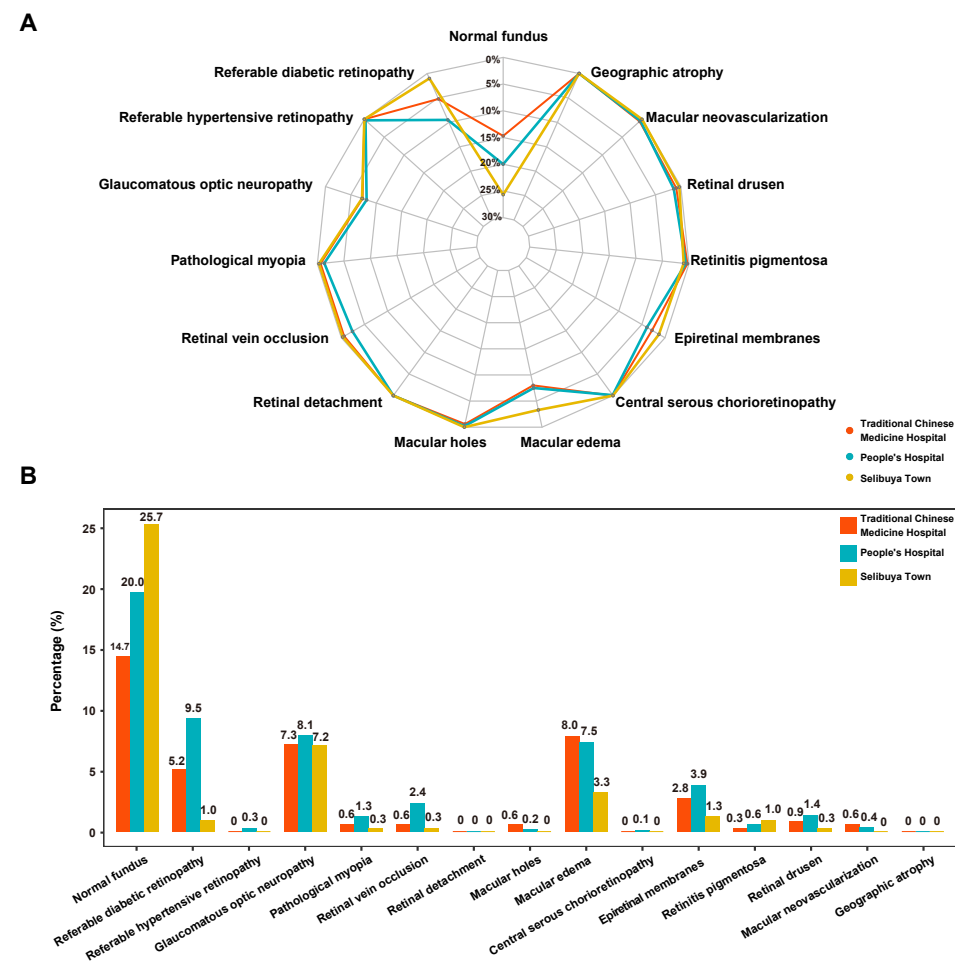

Supplement: inline-supplementary-material-1 [file inline-supplementary-material-1.pdf]
